# Supplementary material for: A flexible, planar energy harvesting device for scavenging road side waste mechanical energy via the synergistic piezoelectric response of K0.5Na0.5NbO3-BaTiO3/PVDF composite films
Source: Royal Society of Chemistry journal article supplement (doi:10.1039/c7nr04115b), 2017-01-01
Supplement: c7nr04115b1.pdf [file c7nr04115b1.pdf]

## Supporting Information

### **A flexible, planar energy harvesting device for scavenging road side waste mechanical energy *via* synergistic piezoelectric response of $\text{K}_{0.5}\text{Na}_{0.5}\text{NbO}_3\text{-BaTiO}_3/\text{PVDF}$ composite films**

*<sup>1</sup>Venkateswaran Vivekanathan, <sup>2</sup>Nagamalleswara Rao Alluri, <sup>1</sup>Yuvasree Purusothaman, <sup>1</sup>Arunkumar Chandrasekhar, <sup>1</sup>Sang-Jae Kim\**

*<sup>1</sup>Nanomaterials and Systems Lab, Department of Mechatronics Engineering,  
<sup>2</sup>Faculty of Applied Energy Systems, Department of Mechanical Engineering,  
Jeju National University, Republic of Korea*

#### **Mailing address:**

***<sup>1</sup>Prof. Sang-Jae Kim\*, <sup>1</sup>Venkateswaran Vivekanathan, <sup>1</sup>Yuvasree Purusothaman & <sup>1</sup>Arunkumar Chandrasekhar,***

Nanomaterials & System Lab, Department of Mechatronics Engineering,  
Engineering Building No:-4, D-130,  
Jeju National University, Ara-1-Dong, Jeju-Si, Jeju-Do  
Jeju-63243, South Korea.

**Email Id:** [kimsangi@jejunu.ac.kr](mailto:kimsangi@jejunu.ac.kr), [vivek@jejunu.ac.kr](mailto:vivek@jejunu.ac.kr), [yuvasreep@jejunu.ac.kr](mailto:yuvasreep@jejunu.ac.kr),  
[arunecebe@jejunu.ac.kr](mailto:arunecebe@jejunu.ac.kr),

\*Corresponding author (**Prof. Sang-Jae Kim**)

***<sup>2</sup>Nagamalleswara Rao Alluri***

School of Applied Energy Systems (Major in Mechanical Engineering),  
Engineering Building No:-4, D-130,  
Jeju National University, Ara-1-Dong, Jeju-Si, Jeju-Do  
Jeju-63243, South Korea.

**Email Id:** [alluri@jejunu.ac.kr](mailto:alluri@jejunu.ac.kr)

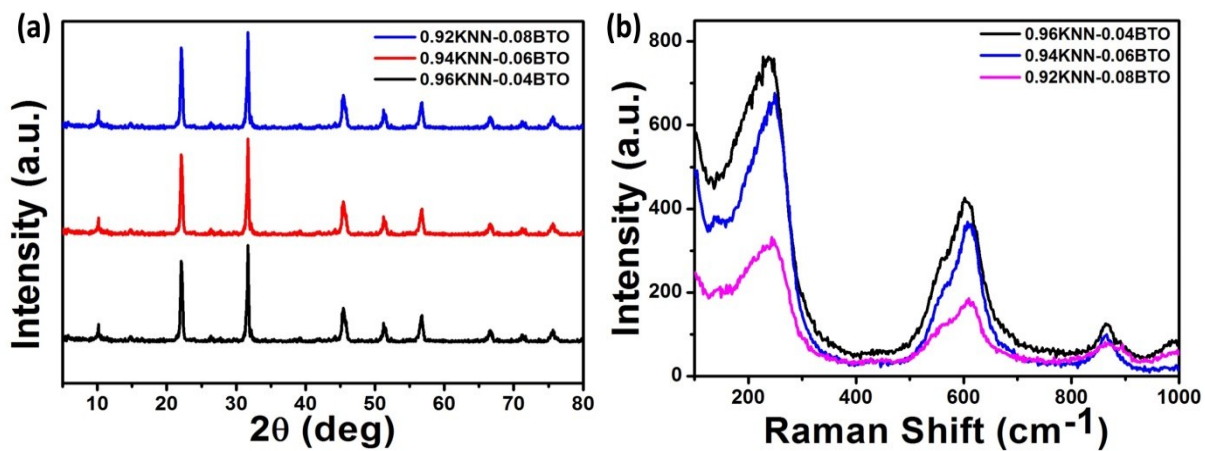

**Figure S1** XRD and Raman spectroscopy analysis of KNN- $x$ BTO nanoparticles ( $x=0.04$ , 0.06 and 0.08)

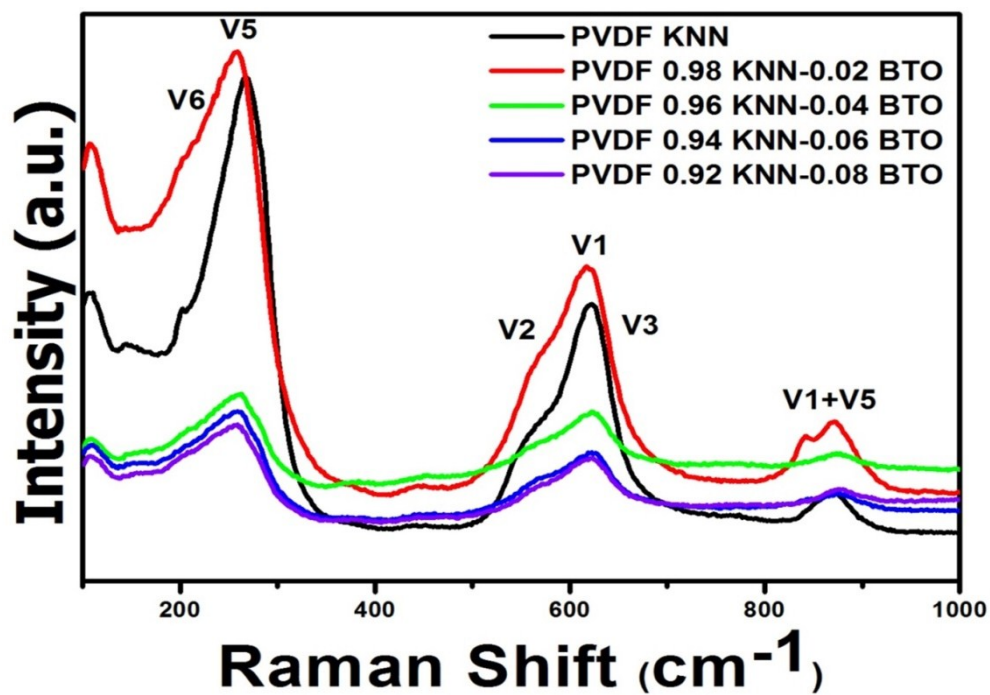

**Figure S2** Raman spectroscopy analysis of PVDF/KNN and PVDF/KNN- $x$ BTO CFs

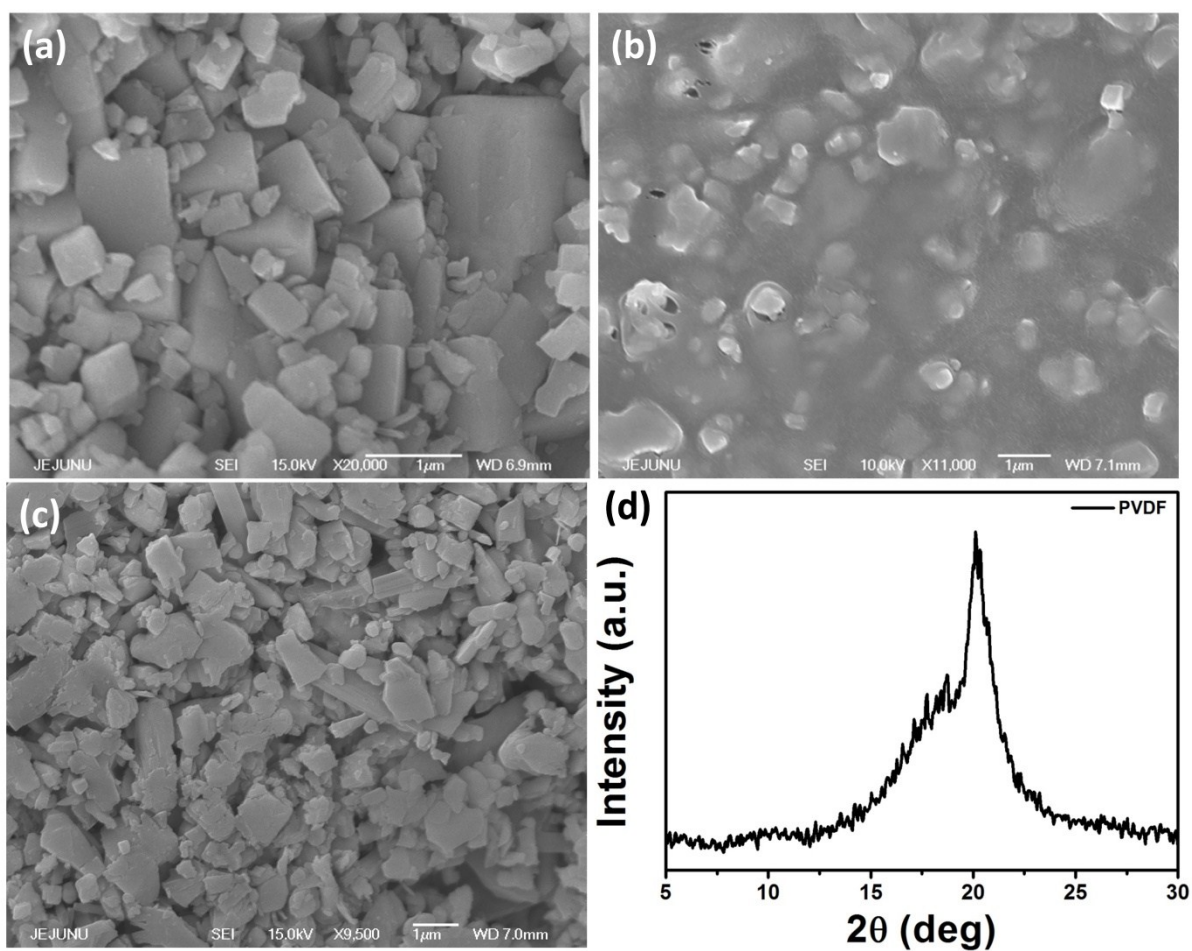

**Figure S3** FE-SEM analysis of (a) Pure KNN (b) PVDF/KNN CF and (c) KNN- $x$ BTO ( $x=0.04$ ) (d) XRD analysis of PVDF film

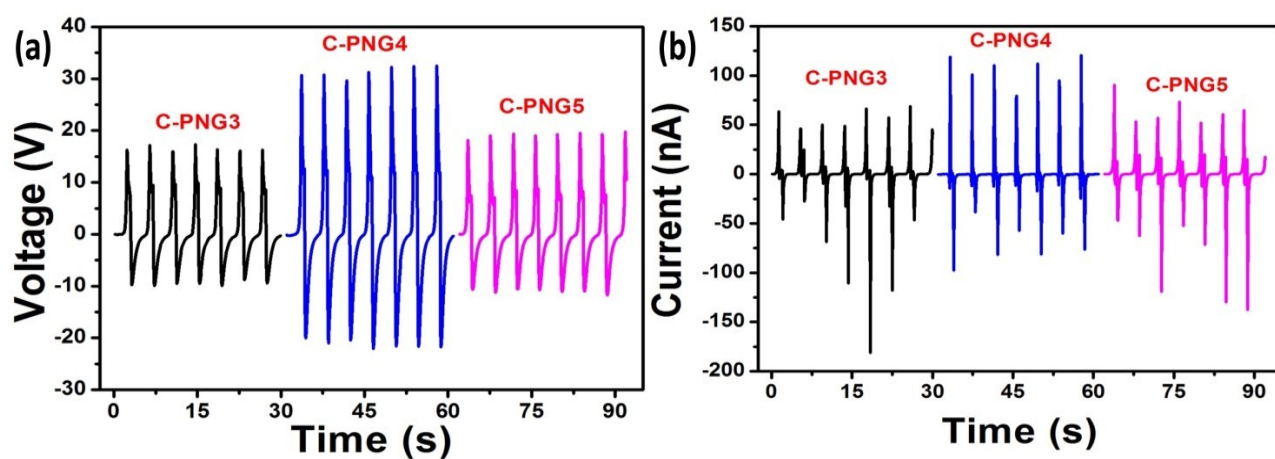

**Figure S4** Voltage and current response of C-PNG3, C-PNG4 and C-PNG5

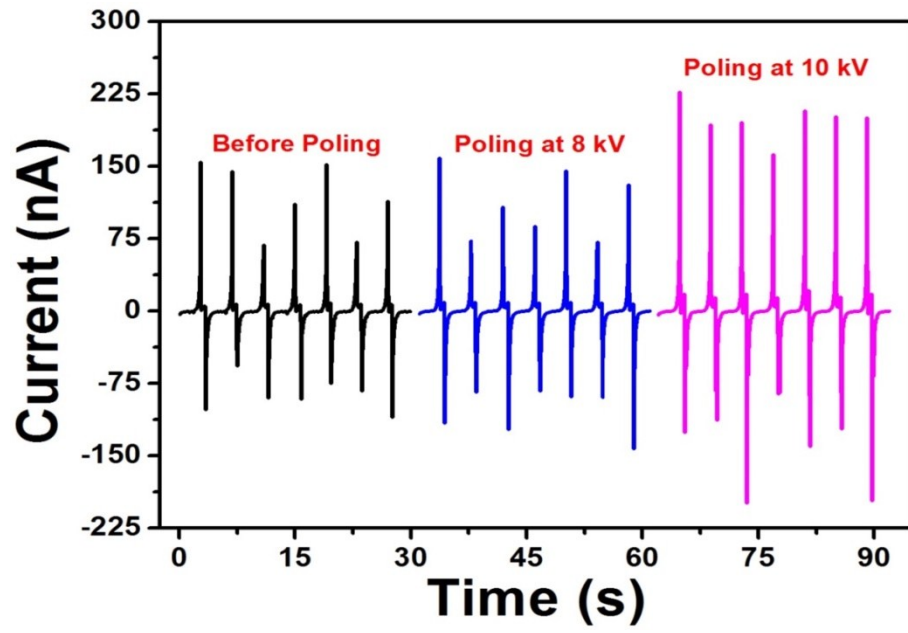

**Figure S5** Poling analysis of C-PNG2 at 8 kV and 10 kV for 24 h

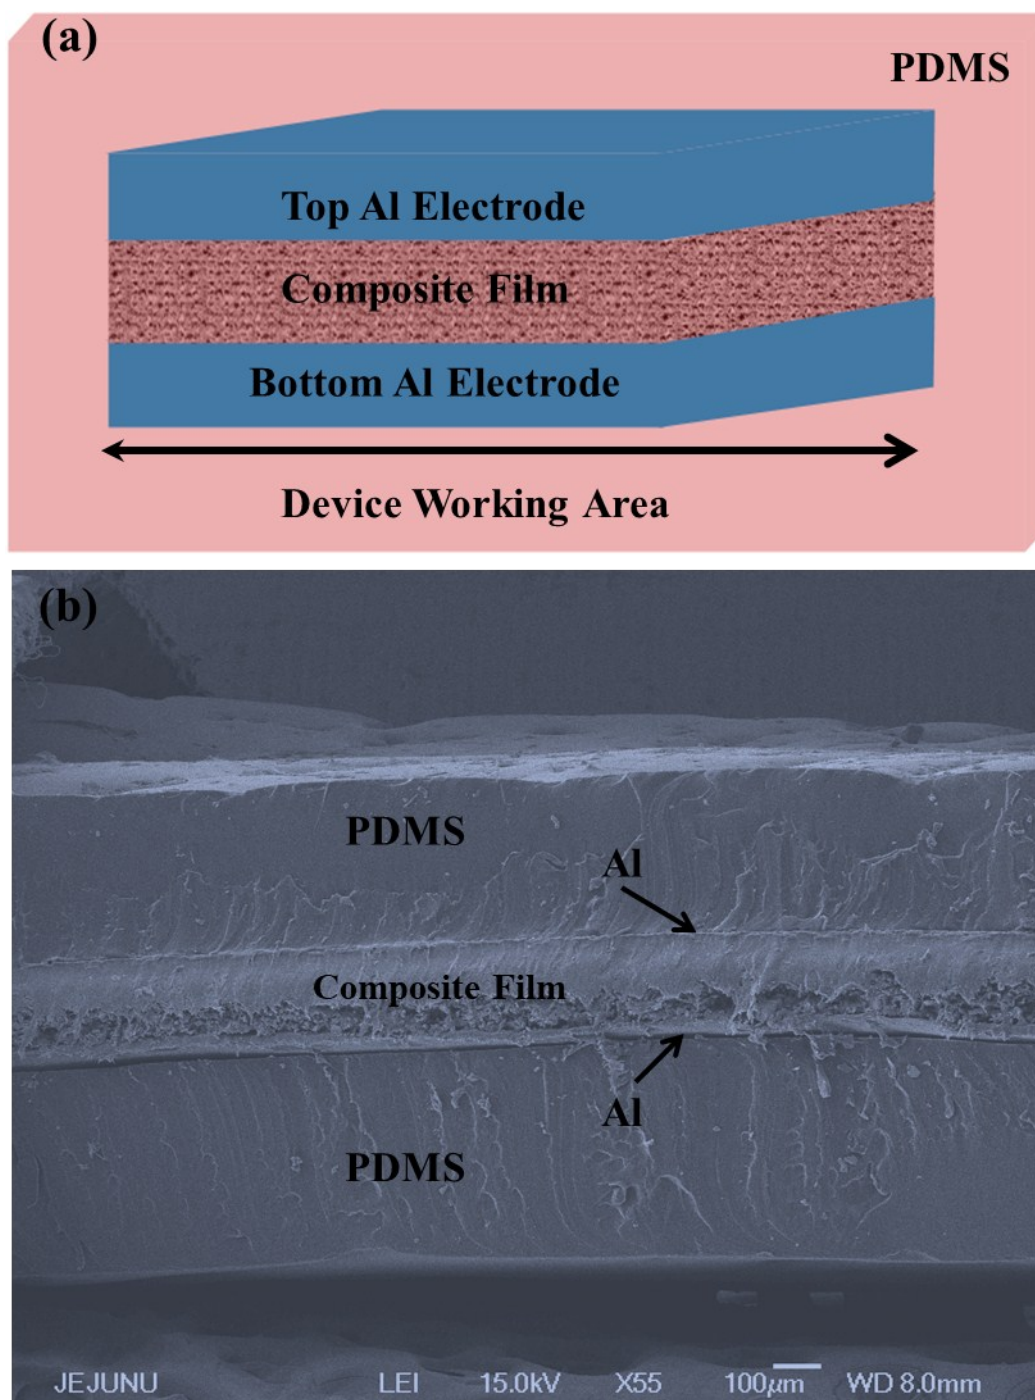

**Figure S6** (a) Layer-by-layer schematic of C-PNG device packed with PDMS matrix (b) Cross-section FE-SEM analysis of C-PNG device
